# Supplementary material
Source: PubMed Central journal article supplement (PMC6903417)
Supplement: NIHMS1041895-supplement-Supplementary_Figures_1-3__Table_2.pdf [file NIHMS1041895-supplement-Supplementary_Figures_1-3__Table_2.pdf]

**Supplementary Figure 1**

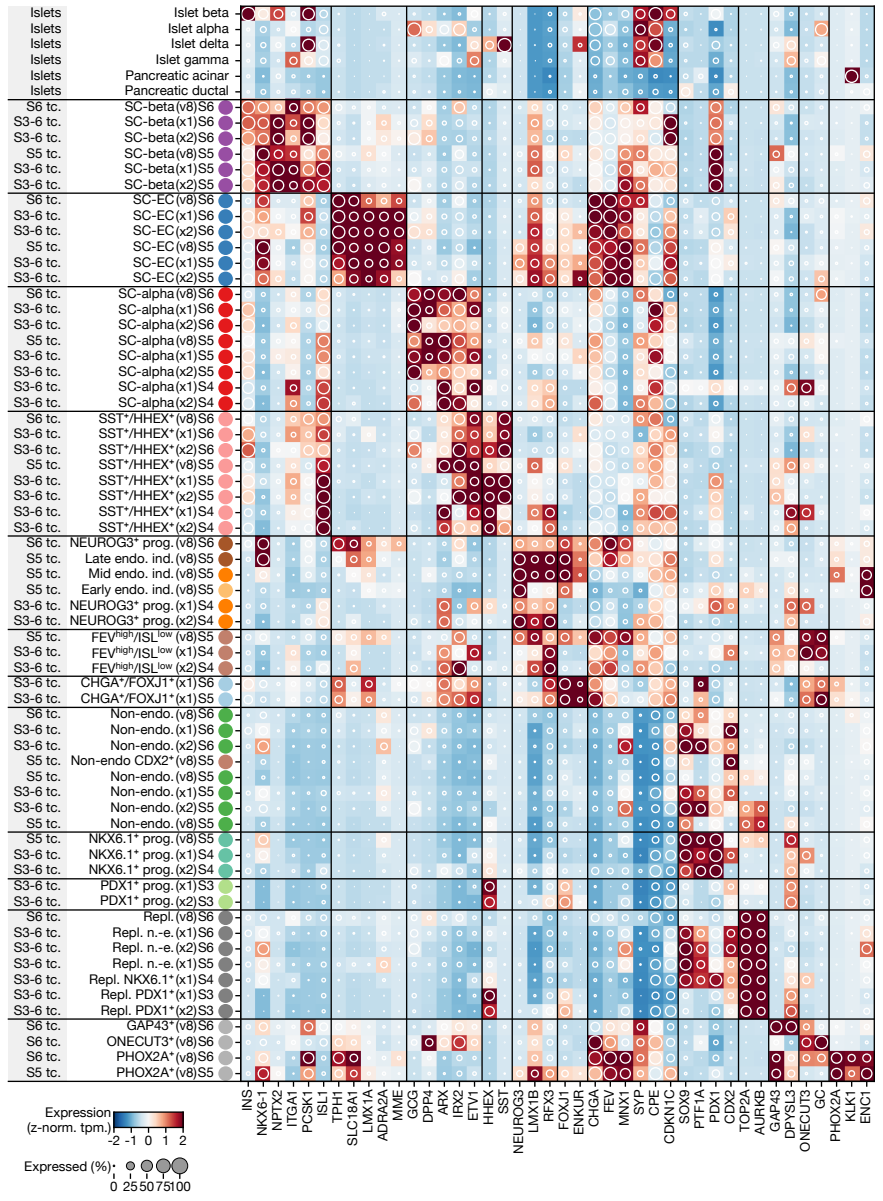

# Supplementary Figure 2

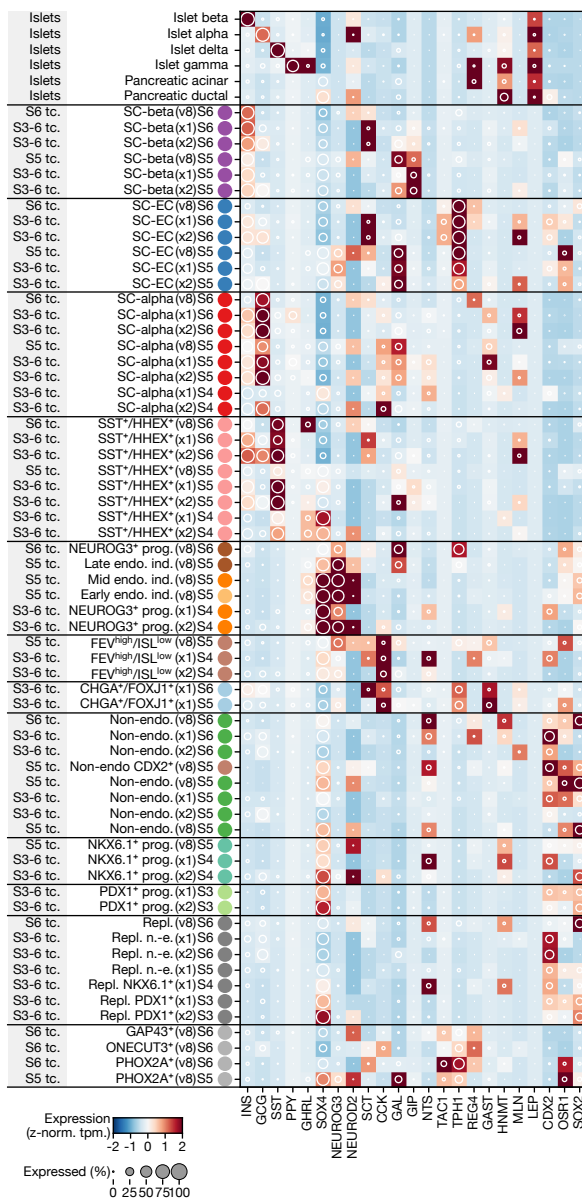

# Supplementary Figure 3

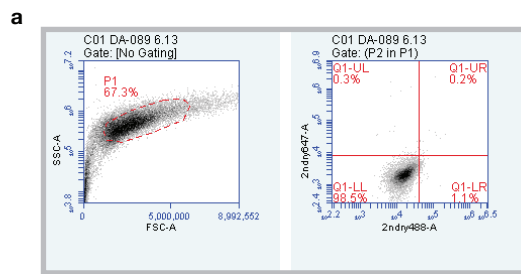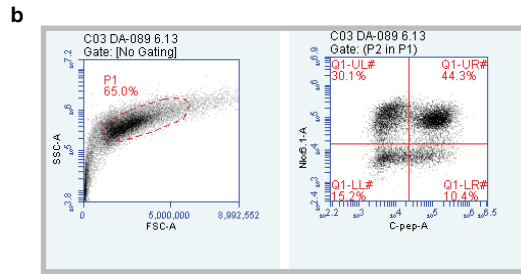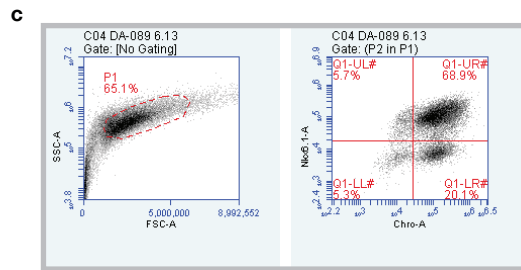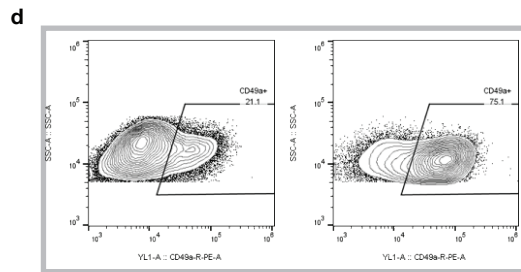

# Supplementary Table 2

|                                   | Purpose                                                                                                                      | Cells used                                                                                                                                      | Cells sequenced                                                                       | Data presented in                                   |
|-----------------------------------|------------------------------------------------------------------------------------------------------------------------------|-------------------------------------------------------------------------------------------------------------------------------------------------|---------------------------------------------------------------------------------------|-----------------------------------------------------|
| <b>Stages 3-6 time course</b>     | <ul style="list-style-type: none"> <li>Identify populations in each stage</li> <li>Compare two protocol variants</li> </ul>  | 2 differentiations<br><br>HUES8, protocol x1<br>HUES8, protocol x2                                                                              | 42,097 cells<br><br>from 16 libraries<br><br>inDrops v2<br>(Harvard Single Cell core) | Figure 1;<br>Extended Data<br>Figure 1              |
| <b>Stage 6 weekly time course</b> | <ul style="list-style-type: none"> <li>Track long-term gene expression changes after differentiation</li> </ul>              | 3 differentiations<br><br>HUES8, protocol v8                                                                                                    | 38,494 cells<br><br>from 36 libraries<br><br>inDrops v2<br>(1Cell Bio)                | Figures 2, 3, 4;<br>Extended Data<br>Figures 3,4,6; |
| <b>Stage 5 daily time course</b>  | <ul style="list-style-type: none"> <li>Establish lineage map of endocrine induction during Stage 5</li> </ul>                | 2 differentiations<br><br>HUES8, protocol v8                                                                                                    | 51,274 cells<br><br>from 32 libraries<br><br>inDrops v2<br>(1Cell Bio)                | Figure 5;<br>Extended Data<br>Figure 8              |
| <b>hESC vs hiPSC comparison</b>   | <ul style="list-style-type: none"> <li>Compare cell populations produced by different pluripotent stem cell lines</li> </ul> | 3 differentiations<br><br>HUES8, protocol v4<br>HUES8, protocol x3<br>iPS1016/31, protocol v4                                                   | 4,312 cells<br><br>from 6 libraries<br><br>inDrops v3<br>(Harvard Single Cell core)   | Extended Data<br>Figure 1                           |
| <b>Re-aggregation analysis</b>    | <ul style="list-style-type: none"> <li>Identify which populations are retained by re-aggregation</li> </ul>                  | 1 differentiation<br>HUES8, protocol v4<br><br>processed into two conditions at the end of Stage 5:<br>- native, in MCDB131<br>- RA, in MCBD131 | 5,636 cells<br><br>from 4 libraries<br><br>inDrops v3<br>(Harvard Single Cell core)   | Extended Data<br>Figure 7                           |
